# Supplementary material
Source: ML conference proceedings conference paper supplement (https://openreview.net/forum?id=EyQO9RPhwN)
Supplement: supplementary_material [file attachment]

large-scale 3D  
dataset

1.pre-training

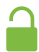

Geometry  
Encoder

Geometry  
Features

Geo-Guided  
Cond. Adaptor

Backbone

Normalization

2.training

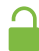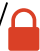

Input

$\partial D$

2.training

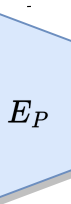

$f_{\text{geo}}$

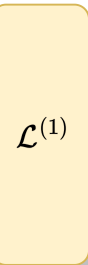

$\mathcal{A}^{(1)}$

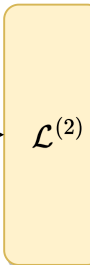

$\mathcal{A}^{(2)}$

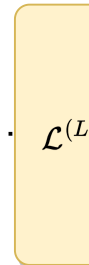

$\mathcal{A}^{(L)}$

Output

2.training

$\bar{D}$

2.training

$\mathcal{L}^{(1)}$

$\mathcal{L}^{(2)}$

$\mathcal{L}^{(L)}$

$f_{\text{geo}}$

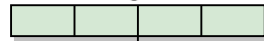

$\mathcal{N}$

FC

$f_{\text{hidden}}$

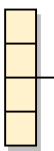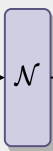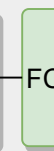

$\oplus$

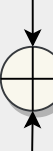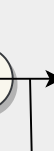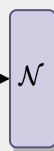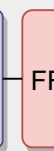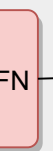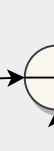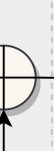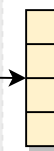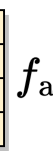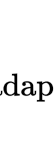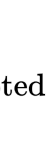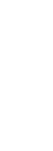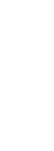

$f_{\text{adapted}}$
